# Supplementary material
Source: publisher site journal article supplement (https://www.dovepress.com/article/440406)
Supplement: Supplementary file 1 [file get_supplementary_file.php]

**Supplementary Material**

**Supplementary Table 1:** Search strategies and searching date for each database searched

| Search strategy | Date searched | Search No. | Query/search | Result |
| --- | --- | --- | --- | --- |
| PubMed | 12/05/2022 | 1 | "Health literacy"[mesh] (Filters applied :Full text, English) | 7319 |
| 2 | "Health literacy"[tiab] ( >> ) | 10889 |
| 3 | "Health literacy"[mesh] OR "Health literacy"[tiab] ( >> ) | 13194 |
| 4 | Ethiopia | 25366 |
| 5 | ("Health literacy"[mesh] OR "Health literacy"[tiab]) AND (Ethiopia) ( >> ) | 46 |
| CINAHL | 19/05/2022 | S1 | "Health Literacy" | 5428 |
| S2 | Ethiopia | 5,793 |
| S3 | S1 AND S2 | 8 |
| PLOS GPH | 04/06/2022 | 1 | "Health literacy" | 2,312 |
| 2 | Ethiopia | 8,326 |
| 3 | "Health literacy" AND Ethiopia | 334 |
| JBI EBP | 22/06/2022 | 1 | “Health literacy” [Ovid, full text] (keyword) | 4955 |
| 2 | Ethiopia [Ovid, full text] (keyword) | 1887 |
| 3 | 1 and 2 | 30 |
| DOAJ | 11/07/2022 | 1 | "Health Literacy" (All fields) | 3,912  (articles) |
| 2 | Ethiopia (All fields) | 20,124  (articles) |
| 3 | "Health literacy" AND Ethiopia (All fields) | 20 (articles) |
| AIM | 23/07/2022 |  | Health literacy and Ethiopia | 3 |
| AJOL | 13/08/2022 |  | “Health literacy” and Ethiopia | 76 |
| Google Scholar | Up to Sep. 9, 2022 |  | Health literacy and Ethiopia | 26 |

**Supplementary Table 2:** Data extraction tool

| **Paper/study information** | |
| --- | --- |
| Title of the study |  |
| Author(s) of the study |  |
| Year of its publication |  |
| Region/state where the study was conducted |  |
| Study aim/objective |  |
| Study setting |  |
| Type of the study (study design and method) |  |
| Study population |  |
| Participants selection process |  |
| Details about participants ( age, gender, and number) |  |
| Concept (health literacy) |  |
| Measures of health literacy |  |
| Key findings of the study |  |

**Supplementary 3: Studies excluded with reasons (n=176)**

**Not exclusively focused on Ethiopian population (n=2)**

1. MCCLINTOCK, H., SCHRAUBEN, S., ANDREWS, A. & WIEBE, D. 2017. Measurement of health literacy to advance global health research: a study based on Demographic and Health Surveys in 14 sub-Saharan countries. *The Lancet Global Health,* 5, S18.
2. MCCLINTOCK, H. F., ALBER, J. M., SCHRAUBEN, S. J., MAZZOLA, C. M. & WIEBE, D. J. 2020. Constructing a measure of health literacy in Sub-Saharan African countries. *Health promotion international,* 35, 907-915.

**Asssessed literacy not health literacy (n=4)**

1. AWGICHEW, S. & SEYOUM, Y. 2017. Integrated functional adult literacy: Existing practices and challenges in Eastern Ethiopia. *International Journal of Education and Literacy Studies,* 5, 86-97.
2. GELANA, G. 2014. An assessment of Ethiopia’s progress towards attaining integrated functional adult literacy. *Bahir Dar journal of education,* 14.
3. GUTA, K. S. & HASAN, M. 2016. The practices of integrated functional adult literacy program in Ethiopia: the case of Oromia. *International Journal of Innovative Research and Development,* 5, 128-133.
4. LEE, H.-Y., OH, J., HEO, J., ABRAHA, A., PERKINS, J. M., LEE, J.-K., TRAN, T. G. H. & SUBRAMANIAN, S. 2019. Association between maternal literacy and child vaccination in Ethiopia and southeastern India and the moderating role of health workers: a multilevel regression analysis of the Young Lives study. *Global health action,* 12, 1581467.

**Concerned with health-related knowledge but did not include/mention/measure the concept of health literacy (n=148)**

1. ABATE, A., DEGAREGE, A. & ERKO, B. 2013. Community knowledge, attitude and practice about malaria in a low endemic setting of Shewa Robit Town, northeastern Ethiopia. *BMC public health,* 13, 1-8.
2. ABATE, H. & MEKONNEN, C. K. 2020. Knowledge, attitude, and precautionary measures towards covid-19 among medical visitors at the University of Gondar comprehensive specialized hospital northwest Ethiopia. *Infection and drug resistance,* 13, 4355.
3. ABATE, M., ASSEFA, N. & ALEMAYEHU, T. 2014. Knowledge, attitude, practice, and determinants emergency contraceptive use among women seeking abortion services in Dire Dawa, Ethiopia. *PLoS One,* 9, e110008.
4. ABDELA, A., WOLDU, B., HAILE, K., MATHEWOS, B. & DERESSA, T. 2016. Assessment of knowledge, attitudes and practices toward prevention of hepatitis B virus infection among students of medicine and health sciences in Northwest Ethiopia. *BMC research notes,* 9, 1-7.
5. ABDELA, O. A., AYALEW, M. B., YESUF, J. S., GETNET, S. A., BIYAZIN, A. A., LEMMA, M. Y. & YIMER, B. T. 2019. Ethiopian university students’ knowledge and perception towards cardiovascular disease risk factors: a cross sectional study. *American Journal of Cardiovascular Disease,* 9, 1.
6. ABEBE, D., BIFFA, D., BJUNE, G., AMENI, G. & ABEBE, F. 2011. Assessment of knowledge and practice about tuberculosis among eastern Ethiopian prisoners. *The International journal of tuberculosis and lung disease,* 15, 228-233.
7. ABEBE, G., DERIBEW, A., APERS, L., WOLDEMICHAEL, K., SHIFFA, J., TESFAYE, M., ABDISSA, A., DERIBIE, F., JIRA, C. & BEZABIH, M. 2010. Knowledge, health seeking behavior and perceived stigma towards tuberculosis among tuberculosis suspects in a rural community in southwest Ethiopia. *PloS one,* 5, e13339.
8. ABRHA, S., ZERATSION, F., MOLLA, F., ETICHA, T., ASSEN, A. & MELKAM, W. 2014. Assessment of knowledge, attitude and practice among regular female preparatory school students towards emergency contraceptives in Mekelle, northern Ethiopia. *International Journal of Pharma Sciences and Research (IJPSR),* 5, 856-864.
9. ADANE, K., SPIGT, M., JOHANNA, L., NOORTJE, D., ABERA, S. F. & DINANT, G.-J. 2017. Tuberculosis knowledge, attitudes, and practices among northern Ethiopian prisoners: Implications for TB control efforts. *PloS one,* 12, e0174692.
10. ADDIS, S. G., NEGA, A. D. & MIRETU, D. G. 2021. Knowledge, attitude and practice of patients with chronic diseases towards COVID-19 pandemic in Dessie town hospitals, Northeast Ethiopia. *Diabetes & Metabolic Syndrome: Clinical Research & Reviews,* 15, 847-856.
11. ADDISSIE, A. 2016. *COLLEGE OF HEALTHSCIENCE SCHOOL OF PUBLIC HEALTH ASSESSMENT OF KNOWLEDGE AND ATTITUDE OF CERVICAL CANCER AND SCREENING AMONG PRIMARY HEALTH CARE WORKERS OF WEST WOLLEGA ZONE, ETHIOPIA, 2016.* ADDIS ABABA UNIVERSITY.
12. ADHENA, G. & HIDRU, H. D. 2020. Knowledge, attitude, and practice of high-risk age groups to Coronavirus Disease-19 prevention and control in Korem District, Tigray, Ethiopia: cross-sectional study. *Infection and Drug Resistance,* 13, 3801.
13. ADINEW, Y. M., WORKU, A. G. & MENGESHA, Z. B. 2013. Knowledge of reproductive and sexual rights among University students in Ethiopia: institution-based cross-sectional. *BMC international health and human rights,* 13, 1-7.
14. AHMED, F. A., MOUSSA, K. M., PETTERSON, K. O. & ASAMOAH, B. O. 2012. Assessing knowledge, attitude, and practice of emergency contraception: a cross-sectional study among Ethiopian undergraduate female students. *BMC public Health,* 12, 1-9.
15. AKALU, Y., AYELIGN, B. & MOLLA, M. D. 2020. Knowledge, attitude and practice towards COVID-19 among chronic disease patients at Addis Zemen Hospital, Northwest Ethiopia. *Infection and drug resistance,* 13, 1949.
16. ALEMU, A., KEBEDE, D. & AMANU, G. 2019. EMERGENCY CONTRACEPTION: KNOWLEDGE AND PRACTICE AMONG FEMALE STUDENTS IN DILLA UNIVERSITY, SOUTHERN ETHIOPIA, 2018. *Ethiopian Journal of Reproductive Health,* 11, 7-7.
17. ALEMU, T., AMARE, S., LEGESSE, S., ABERA, A., AYALEW, M. & BEZABIH, B. 2021. COVID-19 Knowledge, attitude, practices and their associated factors among Dessie city residents, northeast Ethiopia: a cross-sectional study. *Risk Management and Healthcare Policy,* 14, 439.
18. ALIMAW, Y. A., HUSSEN, M. S., TEFERA, T. K. & YIBEKAL, B. T. 2019. Knowledge about cataract and associated factors among adults in Gondar town, northwest Ethiopia. *Plos one,* 14, e0215809.
19. ARARSA, T., TADELE, N., AYALEW, Y. & GELA, D. 2021. Knowledge towards cervical cancer screening and associated factors among urban health extension workers at Addis Ababa, Ethiopia: facility based cross-sectional survey. *BMC cancer,* 21, 1-9.
20. AREDO, M. A., SENDO, E. G. & DERESSA, J. T. 2021. Knowledge of cervical cancer screening and associated factors among women attending maternal health services at Aira Hospital, West Wollega, Ethiopia. *SAGE open medicine,* 9, 20503121211047063.
21. ASHEBIR, W., TADESSE, M. & YIMER, B. 2020. Knowledge and Attitude towards Sexual and Reproductive Health Rights and Associated Factors among High School Students in Machakel District, Northwest Ethiopia.
22. ASMAMAW KASSIE, A., WORKU GUDAYU, T. & MEKONNEN ARAYA, B. 2020. Knowledge, Attitude, and Preventive Practices towards Sexually Transmitted Infections among Preparatory School Students in West Gojjam Zone, Ethiopia.
23. ASMELASH, D., FASIL, A., TEGEGNE, Y., AKALU, T. Y., FEREDE, H. A. & AYNALEM, G. L. 2020. Knowledge, attitudes and practices toward prevention and early detection of COVID-19 and associated factors among religious clerics and traditional healers in Gondar Town, Northwest Ethiopia: a Community-Based Study. *Risk Management and Healthcare Policy,* 13, 2239.
24. AWEKE, Y. H., AYANTO, S. Y. & ERSADO, T. L. 2017. Knowledge, attitude and practice for cervical cancer prevention and control among women of childbearing age in Hossana Town, Hadiya zone, Southern Ethiopia: Community-based cross-sectional study. *PloS one,* 12, e0181415.
25. AYALEW, M., NIGATU, D., SITOTAW, G. & DEBIE, A. 2019. Knowledge and attitude towards sexual and reproductive health rights and associated factors among Adet Tana Haik College students, Northwest Ethiopia: a cross-sectional study. *BMC Research Notes,* 12, 1-7.
26. AYNALEM, Y. A., AKALU, T. Y., GEBRESELLASSIE GEBREGIORGIS, B., SHAREW, N. T., ASSEFA, H. K. & SHIFERAW, W. S. 2021. Assessment of undergraduate student knowledge, attitude, and practices towards COVID-19 in Debre Berhan University, Ethiopia. *PloS one,* 16, e0250444.
27. BEKELE, D., SURUR, F., NIGATU, B., TEKLU, A., GETINET, T., KASSA, M., GEBREMEDHIN, M., GEBREMICHAEL, B. & ABESHA, Y. 2020. Knowledge and attitude towards family planning among women of reproductive age in emerging regions of Ethiopia. *Journal of Multidisciplinary Healthcare,* 13, 1463.
28. BEKELE, D., TOLOSSA, T., TSEGAYE, R. & TESHOME, W. 2021. The knowledge and practice towards COVID-19 pandemic prevention among residents of Ethiopia. An online cross-sectional study. *PLoS One,* 16, e0234585.
29. BELETE, Z. W., BERIHUN, G., KELEB, A., ADEMAS, A., BERHANU, L., ABEBE, M., GIZEYATU, A., HASSEN, S., TESHOME, D. & LINGEREW, M. 2021. Knowledge, attitude, and preventive practices towards COVID-19 and associated factors among adult hospital visitors in South Gondar Zone Hospitals, Northwest Ethiopia. *PloS one,* 16, e0250145.
30. BELETEW ABATE, B., HABTAMU GELAW, K., FENTAW, H., ASHAGIRE, M. & MEKASH, T. 2020. Knowledge Level and Associated Factors of Reproductive Health Issues among Secondary School Students in Woldia Town, Amhara, Ethiopia, 2019: A Cross-Sectional Study. *Journal of Environmental and Public Health,* 2020.
31. BERHANE, Y. & ZAKUS, D. 1995. Community awareness and practice of family planning in an urban community in Addis Ababa, Ethiopia. *Ethiopian Journal of Health Development,* 9.
32. BERIHUN, G., WALLE, Z., TESHOME, D., BERHANU, L., ABEBE, M., ADEMAS, A., GIZEYATU, A., KELEB, A., MALEDE, A. & ATIKILT, G. 2021. Knowledge, Attitude, and Preventive Practices Towards COVID-19 Among Students of Ethiopian Higher Education Institutions. *Journal of Multidisciplinary Healthcare,* 14, 2123.
33. BERRA, W. G. 2013. Knowledge, perception and practice of mothers/caretakers and family’s regarding child nutrition (under 5 years of age) in Nekemte Town, Ethiopia. *Science, Technology and Arts Research Journal,* 2, 78-86.
34. BUSERY, S. & SISAY, M. 2016. Knowledge, attitude and practice of emergency contraceptives among graduating female students of college of health and medical sciences, Haramaya University, Eastern Ethiopia. *Sch Acad J Pharm,* 5, 413-20.
35. CASCONE, D., TOMASSONI, D., NAPOLITANO, F. & DI GIUSEPPE, G. 2019. Evaluation of knowledge, attitudes, and practices about exclusive breastfeeding among women in Italy. *International journal of environmental research and public health,* 16, 2118.
36. DABA, W., ALEMU, T., SHIMBRE, M. S. & TSEGAYE, B. 2019. Knowledge and practice of essential newborn care among postnatal mothers in Addis Ababa City Health Centers, Ethiopia. *Journal of Public Health and Epidemiology,* 11, 170-179.
37. DATIKO, D. G., HABTE, D., JERENE, D. & SUAREZ, P. 2019. Knowledge, attitudes, and practices related to TB among the general population of Ethiopia: Findings from a national cross-sectional survey. *PloS one,* 14, e0224196.
38. DEJAZMACH, Z., ALEMU, G., YIMER, M., TEGEGNE, B. & GETANEH, A. 2021. Prevalence of malaria and associated knowledge, attitude, and practice among suspected patients in Bahir Dar Zuria District, Northwest Ethiopia. *BioMed Research International,* 2021.
39. DEMISSIE, B. W., AZEZE, G. A., ASSEFFA, N. A., LAKE, E. A., BESHA, B. B., GELAW, K. A., MOKONNON, T. M., GEBEYEHU, N. A. & OBSA, M. S. 2022. Communities’ perceptions towards cervical cancer and its screening in Wolaita zone, southern Ethiopia: A qualitative study. *PloS one,* 17, e0262142.
40. DEREJE, N., ASHENAFI, A., ABERA, A., MELAKU, E., YIRGASHEWA, K., YITNA, M., SHEWAYE, S., FASIL, T. & YOSEPH, Y. 2021. Knowledge and acceptance of HPV vaccination and its associated factors among parents of daughters in Addis Ababa, Ethiopia: a community-based cross-sectional study. *Infectious Agents and Cancer,* 16, 1-7.
41. DESALEGN, Z., DEYESSA, N., TEKA, B., SHIFERAW, W., HAILEMARIAM, D., ADDISSIE, A., ABAGERO, A., KABA, M., ABEBE, W. & NEGA, B. 2021. COVID-19 and the public response: Knowledge, attitude and practice of the public in mitigating the pandemic in Addis Ababa, Ethiopia. *PLoS One,* 16, e0244780.
42. DESIE EMIRU, T., BIRLIE, T. A., TASEW, S. F., AMARE, A. T., TIBEBU, N. S. & TIRUNEH, C. M. 2020. Assessment of knowledge, practice and associated factors towards prevention of novel corona virus among clients attending at Debre Tabor General Hospital Debre Tabor Town, North West Ethiopia, 2020: institutional Based Cross-Sectional Study.
43. DESTA, B. & REGASSA, N. 2011. On emergency contraception among female students of Haramaya University, Ethiopia: surveying the level of knowledge and attitude. *Educational research,* 2, 1106-1117.
44. DIRIBA, G., ALEMKERE, G. & GEDAMU, M. 2018. Assessment of patients misunderstanding regarding dosage regimen instructions at nekemte referral hospital, Ethiopia. *J Fam Med,* 5, 1153.
45. ENDALEW, D. A., MOTI, D., MOHAMMED, N., REDI, S. & WASSIHUN ALEMU, B. 2020. Knowledge and practice of cervical cancer screening and associated factors among reproductive age group women in districts of Gurage zone, Southern Ethiopia. A cross-sectional study. *PloS one,* 15, e0238869.
46. FEKADU, Y. 2017. Knowledge attitude and utilization of emergency contraception among health science and medical students of Arba Minch University, 2015.
47. FEKENE, D. B., WOLDEYES, B. S., ERENA, M. M. & DEMISSE, G. A. 2020. Knowledge, uptake of preconception care and associated factors among reproductive age group women in West Shewa zone, Ethiopia, 2018. *BMC women's health,* 20, 1-8.
48. FELEKE, B. T., WALE, M. Z. & YIRSAW, M. T. 2021. Knowledge, attitude and preventive practice towards COVID-19 and associated factors among outpatient service visitors at Debre Markos compressive specialized hospital, north-west Ethiopia, 2020. *Plos one,* 16, e0251708.
49. FETANSA, G., ETANA, B., TOLOSSA, T., GARUMA, M., TESFAYE BEKUMA, T., WAKUMA, B., ETAFA, W., FEKADU, G. & MOSISA, A. 2021. Knowledge, attitude, and practice of health professionals in Ethiopia toward COVID-19 prevention at early phase. *SAGE open medicine,* 9, 20503121211012220.
50. FEYISSA, A. 2017. Assessment of knowledge, attitude and practice towards emergency contraceptive methods among female students in Abdisa Aga High School, Fiche Town, Northern, Ethiopia, 2016. *International Journal of Chinese Medicine,* 1, 16.
51. FIKRIE, A., MARIAM, Y. G., AMAJE, E. & BEKELE, H. 2021. Knowledge about cataract and associated factors among adults in Yirgalem town, Sidama National Regional State, southern Ethiopia, 2020: a community based cross sectional study design. *BMC ophthalmology,* 21, 1-9.
52. FINLAY, J. E., ASSEFA, N., MWANYIKA‐SANDO, M., DESSIE, Y., HARLING, G., NJAU, T., CHUKWU, A., ODUOLA, A., SHAH, I. & ADANU, R. 2020. Sexual and reproductive health knowledge among adolescents in eight sites across sub‐Saharan Africa. *Tropical Medicine & International Health,* 25, 44-53.
53. FLATIE, B. T. & MUNSHEA, A. 2021. Knowledge, Attitude, and Practice towards Malaria among People Attending Mekaneeyesus Primary Hospital, South Gondar, Northwestern Ethiopia: A Cross-Sectional Study. *Journal of Parasitology Research,* 2021.
54. FUGE, T. G., AYANTO, S. Y. & GURMAMO, F. L. 2015. Assessment of knowledge, attitude and practice about malaria and ITNs utilization among pregnant women in Shashogo District, Southern Ethiopia. *Malaria Journal,* 14, 1-9.
55. FURRY, D. B., MASHALLA, Y. & TSHWENEAGAE, G. T. 2019. Sexual and reproductive health among high school adolescents in west Shoa zone, Oromia region in Ethiopia. *African Journal of Reproductive Health,* 23, 65-72.
56. GEBISA, T., BALA, E. T. & DERIBA, B. S. 2022. Knowledge, Attitude, and Practice Toward Cervical Cancer Screening Among Women Attending Health Facilities in Central Ethiopia. *Cancer Control,* 29, 10732748221076680.
57. GEBRE, B., TADDESE, Z., DERIBE, K., LEGESSE, T., OMAR, M. & BIADGILIGN, S. 2016. Knowledge, acceptability, and use of misoprostol for preventing postpartum hemorrhage following home births in rural Ethiopia. *International Journal of Gynecology & Obstetrics,* 134, 79-82.
58. GEBRECHERKOS, T., GIRMAY, G., LEMMA, M. & NEGASH, M. 2020. Knowledge, attitude, and practice towards Hepatitis B virus among pregnant women attending antenatal care at the University of Gondar comprehensive specialized hospital, Northwest Ethiopia. *International journal of hepatology,* 2020.
59. GEBREHIWOT, H., GEBREKIDAN, B., BERHE, H. & KIDANU, K. 2013. Assessment of knowledge, attitude, and practice towards emergency contraceptives among female college students at Mekelle Town, Tigray Region, Ethiopia: A cross sectional study. *International Journal of Pharmaceutical Sciences and Research,* 4, 1027.
60. GEBREKIDAN ABBAY, A., TIBEBE MULATU, A. & AZADI, H. 2018. Community knowledge, perceived beliefs and associated factors of mental distress: a case study from Northern Ethiopia. *International journal of environmental research and public health,* 15, 2423.
61. GEBREMEDHIN, K., GEBRESILLASSIE, T., BIHONE, B., DEMEKE, T. & HABTIE, N. 2017. Assessment of Knowledge, Attitude and Behaviour towards Emergency Contraceptive among Female Students of Fasiledes Preparatory School, Gondar, Ethiopia. *Clinics Mother Child Health,* 14, 2.
62. GEBREMICHAEL, M. A. & CHAKA, E. E. 2015. Assessment of knowledge, attitude and practices on reproductive health among Ambo University students in Ambo, Oromia National Regional State, Ethiopia, 2013/14. *Science Journal of Public Health,* 3, 222-228.
63. GEBRETSADIK, D., AHMED, N., KEBEDE, E., GEBREMICHEAL, S., BELETE, M. A. & ADANE, M. 2021a. Knowledge, attitude, practice towards COVID-19 pandemic and its prevalence among hospital visitors at Ataye district hospital, Northeast Ethiopia. *Plos one,* 16, e0246154.
64. GEBRETSADIK, D., GEBREMICHAEL, S. & BELETE, M. A. 2021b. Knowledge, attitude and practice toward COVID-19 pandemic among population visiting Dessie Health Center for COVID-19 screening, Northeast Ethiopia. *Infection and Drug Resistance,* 14, 905.
65. GEREMEW, A. B., GELAGAY, A. A. & AZALE, T. 2018. Comprehensive knowledge on cervical cancer, attitude towards its screening and associated factors among women aged 30–49 years in Finote Selam town, northwest Ethiopia. *Reproductive health,* 15, 1-12.
66. GETANEH, A., TEGENE, B. & BELACHEW, T. 2021. Knowledge, attitude and practices on cervical cancer screening among undergraduate female students in University of Gondar, Northwest Ethiopia: an institution based cross sectional study. *BMC Public Health,* 21, 1-9.
67. GETAHUN, F., MAZENGIA, F., ABUHAY, M. & BIRHANU, Z. 2013. Comprehensive knowledge about cervical cancer is low among women in Northwest Ethiopia. *BMC cancer,* 13, 1-7.
68. GIRMA, T., EJETA, E., DECHASA, A. & ABDULKADIR, K. 2015. Knowledge, attitude and practices of emergency contraception among female students in preparatory school of East Shoa, Adama, Ethiopia. *Gynecol Obstet (Sunnyvale),* 5, 2161-0932.1000.
69. GUDETA, T. & MECHAL, D. 2019. Patient knowledge of correct dosage regimen; the need for good dispensing practice. *Journal of primary care & community health,* 10, 2150132719876522.
70. HAFTOM, M., PETRUCKA, P., GEMECHU, K., MAMO, H., TSEGAY, T., AMARE, E., KAHSAY, H. & GEBREMARIAM, A. 2020. Knowledge, attitudes, and practices towards covid-19 pandemic among quarantined adults in Tigrai region, Ethiopia. *Infection and drug resistance,* 13, 3727.
71. HAGOS, W. G., MUCHIE, K. F., GEBRU, G. G., MEZGEBE, G. G., REDA, K. A. & DACHEW, B. A. 2020. Assessment of knowledge, attitude and practice towards rabies and associated factors among household heads in Mekelle city, Ethiopia. *BMC public health,* 20, 1-7.
72. HAILU, D., NIGUSSIE, W., GUDETA, T. A., ABDU, M., MOLLA, Y. & ASSEFAW, G. 2018. Assessment of knowledge and attitude towards prevention of mother-to child transmission of HIV/AIDS among antenatal care client in Mizan-Aman town public health facilities, Benchi-Maji Zone, South Nation Nationalities and People Region, Southwest Ethiopia, 2017. *Clinics Mother Child Health,* 15, 2.
73. HAMZA, T. A., AZMACH, N. N. & HUSEN, A. A. 2017. Community knowledge, attitude and practice about malaria and mosquito biting behavior in Southern Ethiopia. *American Journal of BioScience,* 5, 80-88.
74. HUYNH, G., NGUYEN, M. Q., TRAN, T. T., NGUYEN, V. T., NGUYEN, T. V., DO, T. H. T., NGUYEN, P. H. N., PHAN, T. H. Y., VU, T. T. & NGUYEN, T. N. H. 2020. Knowledge, attitude, and practices regarding COVID-19 among chronic illness patients at outpatient departments in Ho Chi Minh City, Vietnam. *Risk Management and Healthcare Policy,* 13, 1571.
75. IYASU, A., KIDANU, B. H. & ZEREABRUK, K. 2021. Knowledge, attitude, and practice towards COVID-19 among chronic disease patients at Aksum Hospital, Northern Ethiopia, 2020: a cross-sectional study. *Asthma Research and Practice,* 7, 1-9.
76. JANAKIRAMAN, B., GEBREYESUS, T., YIHUNIE, M. & GENET, M. G. 2021. Knowledge, attitude, and practice of antenatal exercises among pregnant women in Ethiopia: A cross-sectional study. *Plos one,* 16, e0247533.
77. JEMAL, B., AWEKE, Z., MOLA, S., HAILU, S., ABIY, S., DENDIR, G., TILAHUN, A., TESFAYE, B., ASICHALE, A. & NEME, D. 2021. Knowledge, attitude, and practice of healthcare workers toward COVID-19 and its prevention in Ethiopia: A multicenter study. *SAGE Open Medicine,* 9, 20503121211034389.
78. JIFAR, A. & AYELE, Y. 2018. Assessment of knowledge, attitude, and practice toward antibiotic use among Harar City and its surrounding community, Eastern Ethiopia. *Interdisciplinary perspectives on infectious diseases,* 2018.
79. JIMA, A., SEGNI, M. T. & ZERGAW, A. 2016. Assessment of knowledge, attitude and utilization of emergency contraception among unmarried women of reproductive age in Adama, Ethiopia. *Health Science Journal,* 10, 1.
80. KASA, A. S., TESFAYE, T. D. & TEMESGEN, W. A. 2018. Knowledge, attitude and practice towards cervical cancer among women in Finote Selam city administration, West Gojjam Zone, Amhara Region, North West Ethiopia, 2017. *African health sciences,* 18, 623-636.
81. KASSA ALEMU, B. & BIRU, T. T. 2019. Health care professionals’ knowledge, attitude, and practice towards adverse drug reaction reporting and associated factors at selected public hospitals in Northeast Ethiopia: a cross-sectional study. *BioMed research international,* 2019.
82. KASSA, T. B., BANTIE, G. M. & BEGOSEW, A. M. 2019. Knowledge, Attitude and Practice towards Hepatitis B Virus Prevention and its Associated Factors among Private Medical/Health Sciences College Students, Bahir Dar, Ethiopia.
83. KASSAHUN, T., GESESEW, H., MWANRI, L. & ESHETIE, T. 2016. Diabetes related knowledge, self-care behaviours and adherence to medications among diabetic patients in Southwest Ethiopia: a cross-sectional survey. *BMC endocrine disorders,* 16, 1-11.
84. KASSIE, A. A., GUDAYU, T. W. & ARAYA, B. M. 2020. Knowledge, Attitude, and Preventive Practices towards Sexually Transmitted Infections among Preparatory School Students in West Gojjam Zone, Ethiopia. *Advances in Public Health,* 2020.
85. KASSIE, G. M., MARIAM, D. H. & TSUI, A. O. 2008. Patterns of knowledge and condom use among population groups: results from the 2005 Ethiopian behavioral surveillance surveys on HIV. *BMC Public Health,* 8, 1-14.
86. KEBEDE, A. 2009. Assessment of Knowledge, Attitude and Practice on Emergency contraception among Secondary, Preparatory, and Technical & Vocational School Female Students in Maichew Town, Southern Zone of Tigray, Ethiopia [PhD Thesis]. *Addis Ababa University*.
87. KEBEDE, D., HIBSTU, D., BIRHANU, B. & BEKELE, F. 2017. Knowledge, Attitude and Practice towards Malaria and Associated Factors in Areka Town, Southern Ethiopia: Community-Based Cross Sectional Study. *J Trop Dis,* 5, 1-11.
88. KEBEDE, N., WORKU, A., ALI, A., ANIMUT, A., NEGASH, Y., GEBREYES, W. A. & SATOSKAR, A. 2016. Community knowledge, attitude and practice towards cutaneous leishmaniasis endemic area Ochello, Gamo Gofa Zone, South Ethiopia. *Asian Pacific journal of tropical biomedicine,* 6, 562-567.
89. KEBEDE, Y., YITAYIH, Y., BIRHANU, Z., MEKONEN, S. & AMBELU, A. 2020. Knowledge, perceptions and preventive practices towards COVID-19 early in the outbreak among Jimma university medical center visitors, Southwest Ethiopia. *PloS one,* 15, e0233744.
90. KIBRET, M. 2003. Reproductive health knowledge, attitude and practice among high school students in Bahir Dar, Ethiopia. *African journal of reproductive health*, 39-45.
91. LAKSHMI, G. V., KUMARI, P. R. & NAIDU, S. A. 2014. Knowledge, attitude and practices of emergency contraception among female medical students of Andhra Medical College, Visakhapatnam. *Religion,* 77, 82.7.
92. LENJISA, J., ULFINA, D., TAMME, E., KABA, G., BEREHE, H., LEMMA, N. & WOLDU, M. 2014. Knowledge and practice of emergency contraceptives among students at Ambo Techniques College, Ethiopia. *Reprod Syst Sex Disord,* 3, 2.
93. LENJISA, J. L., GETACHEW, Z. G., TOLA, N. L., KIFLE, S. T., GETACHEW, D., BEKELE, G. D. D. & WOLDU, M. A. 2013. Knowledge, attitude and practice of emergency contraceptives among ambo university female students, West Showa, Ethiopia. *Research Journal of Pharmaceutical Sciences ISSN,* 2319, 555X.
94. MAMUYE, S. A., WUDINEH, K. G., BELAY, A. N. & GIZACHEW, K. D. 2021. Assessment of Knowledge, Attitudes, and Practices Regarding Emergency-Contraception Methods among Female Dangila Hidase High School Students, Northwest Ethiopia, 2019. *Open Access Journal of Contraception,* 12, 1.
95. MEKONNEN, A. G., BAYLEYEGN, A. D., AYNALEM, Y. A., ADANE, T. D., MULUNEH, M. A. & ASEFA, M. 2020. Level of knowledge, attitude, and practice of family planning and associated factors among disabled persons, north-shewa zone, Amhara regional state, Ethiopia. *Contraception and Reproductive Medicine,* 5, 1-7.
96. MEKONNEN, B. D., GELAGAY, A. A. & LAKEW, A. M. 2021. Knowledge and associated factors of postpartum contraceptive use among women in the extended postpartum period in Gondar city, Northwest Ethiopia. *Open Access Journal of Contraception,* 12, 7.
97. MEKURIAW, S., DEREJE, R., KUMALO, A. & FEYISSA, M. 2015. Knowledge, attitude and practice towards safe abortion among female students of Mizan-Tepi University, Southwest Ethiopia. *Journal of Womens Health Care,* 4, 2167-2420.
98. MENENE, A., GETACHEW, A., KEDIRO, A. & GUTEMA, B. 2020. Assessment of Knowledge, Attitude and Practice Toward Emergency Contraceptive Among Females Student at Unity University, Adama Town, Oromia Regional State, Ethiopia. *International Journal of Clinical and Experimental Medical Sciences,* 6, 96.
99. MENGESHA, Y. & AMARE, E. 2020. Assessment of Patients Misunderstanding of Dosing Instructions among Outpatients in Dessie Referral Hospital, Northeast Ethiopia. *Risk Management and Healthcare Policy,* 13, 3079.
100. MENGISTU, S. 2007. *Assessment of Level of Awareness and Utilization of Emergency Contraception, among College Female Students in Oromia Regional State, Arsi Zone, Asella Town South-East Ethiopia.* Addis Ababa University.
101. MENJETTA, T. 2021. Assessment of Knowledge, Attitude, and Practice towards Prevention and Control of Malaria in Halaba Town, Southern Ethiopia, 2017. *Journal of Tropical Medicine,* 2021.
102. MESFIN, D. 2020. Emergency contraceptive knowledge, utilization and associated factors among secondary school students in Wolkite town, southern Ethiopia, cross sectional study. *Contraception and Reproductive Medicine,* 5, 1-10.
103. MISHORE, K. M., WOLDEMARIAM, A. D. & HULUKA, S. A. 2019. Emergency contraceptives: knowledge and practice towards its use among Ethiopian female college graduating students. *International journal of reproductive medicine,* 2019.
104. MITIKE, G., MARIAM, D. H. & TSUI, A. 2011. Patterns of knowledge and condom use among population groups: Results from the 2005 Ethiopian Behavioral Surveillance Surveys on HIV. *Ethiopian Journal of Health Development,* 25, 35-45.
105. MOLLA, K. A. & ABEGAZ, S. B. 2021. Community knowledge, attitude and practices to SARS-CoV-2 disease 2019 (COVID-19): A cross-sectional study in Woldia town, Northeast Ethiopia. *PLoS One,* 16, e0250465.
106. NEGASSA, A. & NEGASH, A. 2001. Knowledge, attitude and practice of trained traditional birth attendants on HIV/AIDS prevention in Jimma town, Southwest Ethiopia. *Ethiopian Journal of Health Sciences,* 11.
107. NEGESA, L. B., MAGAREY, J., RASMUSSEN, P. & HENDRIKS, J. M. 2020. Patients’ knowledge on cardiovascular risk factors and associated lifestyle behaviour in Ethiopia in 2018: A cross-sectional study. *Plos one,* 15, e0234198.
108. NEGUSSIE, G. T., JIMA, A. & SHIFERAW, A. 2021. Assessment of Knowledge, Attitude and Utilization of Emergency Contraception Among Women of Reproductive Age in Arsi Zone, Ethiopia.
109. NIBABE, W. T. 2013. *Female college students' knowledge, attitude and practice towards sex and emergency contraceptives.*
110. NIBABE, W. T. & MGUTSHINI, T. 2014. Emergency contraception amongst female college students-knowledge, attitude and practice. *African Journal of Primary Health Care and Family Medicine,* 6, 1-7.
111. NIGUSSIE, T., ASEFA, A., NIGUSSE, A. & ADMASSU, B. 2020. Knowledge Toward Cervical Cancer and Its Determinants Among Women Aged 30-49 in Jimma Town, Southwest Ethiopia. *Cancer Control,* 27, 1073274820983027.
112. NIGUSSIE, T. F. & AZMACH, N. N. 2020. Knowledge, attitude and practice towards covid-19 among Arba Minch town, southern Ethiopia. *GSJ,* 8, 1283-1307.
113. SALEEM, A., BEKELE, A., FITZPATRICK, M. B., MAHMOUD, E. A., LIN, A. W., VELASCO, H. E. & RASHED, M. M. 2019. Knowledge and awareness of cervical cancer in Southwestern Ethiopia is lacking: A descriptive analysis. *PLoS One,* 14, e0215117.
114. SAOL, T. & DESALEGN, L. 2019. Knowledge, Attitude and Practice of Modern Family Planning among Reproductive Age Group Women in Worabe Town, Ethiopia. *J Preg Child Health,* 6, 2.
115. SEIFU, M., GASHE, F., JEMAL, A., TESSEMA, S. & AMELO, W. 2016. Assessment of the knowledge, attitude and practice of EC and barriers to its use among the antenatal care seekers of Sululta Health Centers, Oromia region, Ethiopia. *International Journal,* 2, 29.
116. SEMACHEW KASA, A., TAREKEGN, M. & EMBIALE, N. 2018. Knowledge, attitude and practice towards family planning among reproductive age women in a resource limited settings of Northwest Ethiopia. *BMC research notes,* 11, 1-6.
117. SHIFERAW, B. Z., GASHAW, B. T. & TESSO, F. Y. 2016. Knowledge, Attitude and Practice of Emergency Contraceptives among Mizan-Tepi University Female Students, South West Ethiopia. *Journal of Pain Management & Medicine,* 2, 1-7.
118. TADELE, N., HABTA, F., AKMEL, D. & DEGES, E. 2016. Knowledge, attitude and practice towards exclusive breastfeeding among lactating mothers in Mizan Aman town, Southwestern Ethiopia: descriptive cross-sectional study. *International breastfeeding journal,* 11, 1-7.
119. TADESSE, T., DANGISSO, M. H. & ABEBO, T. A. 2020. Sexual and reproductive health rights knowledge and reproductive health services utilization among rural reproductive age women in Aleta Wondo District, Sidama zone, Ethiopia: community based cross-sectional study. *BMC international health and human rights,* 20, 1-9.
120. TAJURE, N. 2010. Knowledge, attitude and practice of emergency contraception among graduating female students of Jimma University, Southwest Ethiopia. *Ethiopian journal of health sciences,* 20.
121. TAMIRE, W. & ENQUESELASSIE, F. 2007. Knowledge, attitude, and practice on emergency contraceptives among female university students in Addis Ababa, Ethiopia. *Ethiopian Journal of Health Development,* 21, 111-116.
122. TAYE, G. M., BOSE, L., BERESSA, T. B., TEFERA, G. M., MOSISA, B., DINSA, H., BIRHANU, A. & UMETA, G. 2020. COVID-19 knowledge, attitudes, and prevention practices among people with hypertension and diabetes mellitus attending public health facilities in Ambo, Ethiopia. *Infection and Drug Resistance,* 13, 4203.
123. TEGEGN, A., YAZACHEW, M. & GELAW, Y. 2008. Reproductive health knowledge and attitude among adolescents: a community based study in Jimma Town, Southwest Ethiopia. *The Ethiopian Journal of Health Development,* 22.
124. TEKLE, T., WOLKA, E., NEGA, B., KUMMA, W. P. & KOYIRA, M. M. 2020. Knowledge, attitude and practice towards cervical cancer screening among women and associated factors in hospitals of Wolaita Zone, Southern Ethiopia. *Cancer management and research,* 12, 993.
125. TEMESGEN, K., WORKIE, A. & TSEGAYE, D. 2017. Assessment of knowledge, attitude and practice towards emergency contraceptives and associated factors among Wollo University (Dessie Campus) undergraduate female students in Dessie, Ethiopia. *J Epidemiol Public Health Rev,* 2.
126. TESFA, A., BIZUNEH, D., TESFAYE, T., GEBRU, A. A., AYENE, Y. Y. & TAMENE, A. 2015. Assessment of knowledge, attitude and practice towards emergency contraceptive methods among female students in Seto Semero high school, Jimma town, south west Ethiopia. *Science Journal of Public Health,* 3, 478-486.
127. TESFAHUN, A., DHERESA, M., DERESSA, A. & ASSEBE, T. Knowledge and Attitude on Cervical Cancer Screening, and Its Associated Factors among 21-64 Years Old Women Who Visit Public Hospital for Various Reasons in Harar Town, Eastern Ethiopia, 2021.
128. TESFAYE, G., ASFAW, S., ABERA, M., LAKEW, M., WODAYNEW, T. & MAMO, A. 2020. Cervical Cancer Screening Practice and Associated Factors Among Women Employees in Wolaita Zone Hospitals, Southern Ethiopia, 2017.
129. TESFAYE, K. 2019. Assessment of Knowledge, Attitude, Practice and Associated Factors on Emergency Contraception Among Level-Ii to Level-Iv Female Students in Hawassa College of Health Sciences, South, Ethiopia. *Journal of Medical Care Research and Review,* 2, 205-216.
130. TESFAYE, T., TILAHUN, T. & GIRMA, E. 2012. Knowledge, attitude and practice of emergency contraceptive among women who seek abortion care at Jimma University specialized hospital, southwest Ethiopia. *BMC women's health,* 12, 1-6.
131. TESFAYE, Y., AGENAGNEW, L., ANAND, S., TUCHO, G. T., BIRHANU, Z., AHMED, G., GETNET, M. & YITBAREK, K. 2021. Knowledge of the community regarding mental health problems: a cross-sectional study. *BMC psychology,* 9, 1-9.
132. THOMAS, G., GEDIF, T., ABESHU, M. & GELETA, B. 2016. Assessment of knowledge, attitude and practices regarding medication abortion among regular undergraduate female students in College of Social Sciences Addis Ababa University, Ethiopia. *Adv Pharmacoepidemiol Drug Saf,* 5, 2167-1052.1000.
133. TILAHUN, A. & MAMO, A. 2020. Knowledge, attitude and practice towards risky sexual behaviors among secondary and preparatory students of Metu town, south western Ethiopia. *BMC Public Health,* 20, 1-8.
134. TILAHUN, D., ASSEFA, T. & BELACHEW, T. 2010. Knowledge, attitude and practice of emergency contraceptives among Adama University female students, Ethiopia. *Ethiopian journal of health sciences,* 20.
135. TILAHUN, E. 2010. *Knowledge, Attitude and Practice on Emergency Contraception among Preparatory, and High School Female Students in Debrezeit Town Oromia Regional State, Ethiopia.* Addis Ababa University.
136. TILAHUN, T., COENE, G., LUCHTERS, S., KASSAHUN, W., LEYE, E., TEMMERMAN, M. & DEGOMME, O. 2013. Family planning knowledge, attitude and practice among married couples in Jimma Zone, Ethiopia. *PloS one,* 8, e61335.
137. TILAHUN, T., TULU, T. & DECHASA, W. 2019. Knowledge, attitude and practice of cervical cancer screening and associated factors amongst female students at Wollega University, western Ethiopia. *BMC research notes,* 12, 1-5.
138. TOLOSSA, D., MEDHIN, G. & LEGESSE, M. 2014. Community knowledge, attitude, and practices towards tuberculosis in Shinile town, Somali regional state, eastern Ethiopia: a cross-sectional study. *BMC public health,* 14, 1-13.
139. VIVAS, A., GELAYE, B., ABOSET, N., KUMIE, A., BERHANE, Y. & WILLIAMS, M. A. 2010. Knowledge, attitudes, and practices (KAP) of hygiene among school children in Angolela, Ethiopia. *Journal of preventive medicine and hygiene,* 51, 73.
140. WARRI, B. K. & GURMU, T. G. 2018. Knowledge, attitude and practice of progestin-only emergency contraceptives among female students of Jimma Teachers Training College, Jimma, Ethiopia. *Ghana Medical Journal,* 52, 183-188.
141. WERET, Z. S., YLEMEN, C. & MUKHERJEE, R. 2015. Knowledge of Emergency Contraceptive and Associated Factors Among Regular Undergraduate Female Students at Arbaminch University, Ethiopia: Cross sectional Study. *American Multidisciplinary International Research Journal,* 2, 34-40.
142. WOLDU, B. F., LEMU, L. G. & MANDARO, D. E. 2020. Comprehensive knowledge towards cervical cancer and associated factors among women in Durame town, Southern Ethiopia. *Journal of cancer epidemiology,* 2020.
143. WORKU, A. 2011. Knowledge, attitude and practice of emergency contraceptives among female college students in Arba Minch Town, Southern Ethiopia. *Ethiopian Journal of Health Development,* 25, 176-183.
144. YEMANEH, Y., ABERA, T., HAILU, D., CHEWAKA, L. & NIGUSSIE, W. 2017. Knowledge, Attitude and Utilization towards Emergency Contraceptive among Preparatory Students of Mizan High School Students, Bench-Maji Zone, South West, Ethiopia, 2016. *J Women's Health Care,* 6, 2167-0420.1000400.
145. YESUF, M. & ABDU, M. 2022. Knowledge, attitude, prevention practice, and associated factors toward COVID-19 among preparatory school students in Southwest Ethiopia, 2021. *PloS one,* 17, e0262907.
146. YITAYIH, G., YITAYIH, Y., SINTAYEHU, M., ASSEFA, Y. & ZEMENE, A. Evaluation of Awareness, Perception and Utilization Towards Emergency Contraceptive among Female Students in Private College at Bahir Dar, North West Ethiopia, 2014. *emergency,* 19, 20.
147. YUSUF, A. M. & IBRAHIM, N. A. 2019. Knowledge, attitude and practice towards dengue fever prevention and associated factors among public health sector health-care professionals: in Dire Dawa, eastern Ethiopia. *Risk Management and Healthcare Policy,* 12, 91.
148. ZELEKE, A. M. & BAYEH, G. M. 2022. Knowledge, attitude and practice towards COVID-19 and associated factors among pregnant women at Debark Town Northwest Ethiopia: An institutional-based cross-sectional study.

**Assessed utilization of health services but did not mention/measure the concept of health literacy (n= 8)**

1. BOTH, R. 2015. Emergency contraceptive use in Addis Ababa, Ethiopia: challenging common assumptions about young people’s contraceptive practices. *Reproductive health matters,* 23, 58-67.
2. CHERE, N. & BELETE, T. 2017. Emergency contraceptive use and associated factors among undergraduate female students in Wollo University, Dessie, Ethiopia. *Journal of Public Health and Epidemiology,* 9, 272-278.
3. FELEKE, A. E., NIGUSSIE, T. S. & DEBELE, T. Z. 2019. Utilization and associated factors of emergency contraception among women seeking abortion services in health institutions of Dessie town, North East Ethiopia, 2018. *BMC Research Notes,* 12, 1-6.
4. KABA, M., TAYE, G., GIZAW, M. & MITIKU, I. 2017. Maternal health service utilization in urban slums of selected towns in Ethiopia: Qualitative study. *Ethiopian Journal of Health Development,* 31, 96-102.
5. KASIM, J., KALU, A., KAMARA, B. & ALEMA, H. B. 2020. Cervical Cancer screening service utilization and associated factors among women in the Shabadino District, Southern Ethiopia. *Journal of Cancer Epidemiology,* 2020.
6. LEGESSE ABERA, A. S., GUTA, A. & BELAY, Y. 2021. Emergency contraceptive utilization and associated factors among college students in Dire Dawa City, Eastern Ethiopia: A cross-sectional study. *European Journal of Midwifery,* 5.
7. MOSHI, F. V., BAGO, M., NTWENYA, J., MPONDO, B. & KIBUSI, S. M. 2019. Uptake of cervical cancer screening services and its association with cervical cancer awareness and knowledge among women of reproductive age in Dodoma, Tanzania: a cross-sectional study. *The East African Health Research Journal,* 3, 105.
8. TENAW, L. A. 2022. Practice and determinants of emergency contraceptive utilization among women seeking termination of pregnancy in Northwest Ethiopia—A mixed quantitative and qualitative study. *Plos one,* 17, e0263776.

**Assessed health-seeking behavior but did not include/measure the concept of health literacy (n=4)**

1. ALEMU, Y. 2014. Perceived causes of mental health problems and help-seeking behavior among university students in Ethiopia. *International Journal for the Advancement of Counselling,* 36, 219-228.
2. ASFAW, L. S., AYANTO, S. Y. & AWEKE, Y. H. 2018. Health-seeking behavior and associated factors among community in Southern Ethiopia: Community based cross-sectional study guided by Health belief model. *BioRxiv*, 388769.
3. GEBREEGZIABHER, Y., GIRMA, E. & TESFAYE, M. 2019. Help-seeking behavior of Jimma university students with common mental disorders: a cross-sectional study. *PloS one,* 14, e0212657.
4. MENBERU, M., MEKONEN, T., AZALE, T., AYANO, G., YIMER, S., GETNET, A., BELETE, A., KERIE, S. & FEKADU, W. 2018. Health care seeking behavior for depression in Northeast Ethiopia: depression is not considered as illness by more than half of the participants. *Annals of general psychiatry,* 17, 1-7.

**Assessed self-care practice but did not include/measure the concept of health literacy (n=3)**

1. LETTA, S., AGA, F., YADETA, T. A., GEDA, B. & DESSIE, Y. 2021. Barriers to Diabetes Patients’ Self-Care Practices in Eastern Ethiopia: A Qualitative Study from the Health Care Providers Perspective. *Diabetes, Metabolic Syndrome and Obesity: Targets and Therapy,* 14, 4335.
2. NIRIAYO, Y. L., IBRAHIM, S., KASSA, T. D., ASGEDOM, S. W., ATEY, T. M., GIDEY, K., DEMOZ, G. T. & KAHSAY, D. 2019. Practice and predictors of self-care behaviors among ambulatory patients with hypertension in Ethiopia. *PloS one,* 14, e0218947.
3. TEWAHIDO, D. & BERHANE, Y. 2017. Self-care practices among diabetes patients in Addis Ababa: a qualitative study. *PloS one,* 12, e0169062.

**Assessed adherance to medication/health recommendations but did not include/measure the concept of health literacy (n=3)**

1. KEBEDE, A. & WABE, N. T. 2012. Medication adherence and its determinants among patients on concomitant tuberculosis and antiretroviral therapy in South West Ethiopia. *North American journal of medical sciences,* 4, 67.
2. MOHAMMED, M. A. & SHAREW, N. T. 2019. Adherence to dietary recommendation and associated factors among diabetic patients in Ethiopian teaching hospitals. *The Pan African Medical Journal,* 33.
3. SEID, M. A., ABDELA, O. A. & ZELEKE, E. G. 2019. Adherence to self-care recommendations and associated factors among adult heart failure patients. From the patients’ point of view. *PLoS One,* 14, e0211768.

**Other different reasons (n=4)**

1. ABEGAZ, T. M., SHEGENA, E. A., GESSIE, N. F., GEBREYOHANNES, E. A. & SEID, M. A. 2020. Barriers to and competency with the use of metered dose inhaler and its impact on disease control among adult asthmatic patients in Ethiopia. *BMC pulmonary medicine,* 20, 1-13.

**Reason**: It assessed competence with the use of metered dose inhaler but the concept of health literacy was not mentioned or measured with standardized tool.

1. HAILU, F. B., HJORTDAHL, P. & MOEN, A. 2018. Nurse-led diabetes self-management education improves clinical parameters in Ethiopia. *Frontiers in public health,* 6, 302.

**Reason**: It is about health education not health literacy.

1. HASSEN, H. M., BEHERA, M. R., JENA, P. K. & SATPATHY, S. K. 2020. A quasi-experimental and Guided Social Media Intervention to Improve Mental Health Literacy Level of Urban School Adolescents in Ethiopia: A Detailed Study Protocol.

**Reason**: It was a study protocol.

1. TORA, A., TADELE, G., ASEFFA, A., MCBRIDE, C. M. & DAVEY, G. 2017. Health beliefs of school-age rural children in podoconiosis-affected families: A qualitative study in Southern Ethiopia. *PLoS neglected tropical diseases,* 11, e0005564.

**Reason**: It assessed health beliefs not health literacy.
